# Supplementary material
Source: PubMed Central journal article supplement (PMC9305987)
Supplement: NIHMS1820811-supplement-Supplementary_Information_Gating_Strategy.pdf [file NIHMS1820811-supplement-Supplementary_Information_Gating_Strategy.pdf]

# Gating strategy

(IgG staining as negative control)

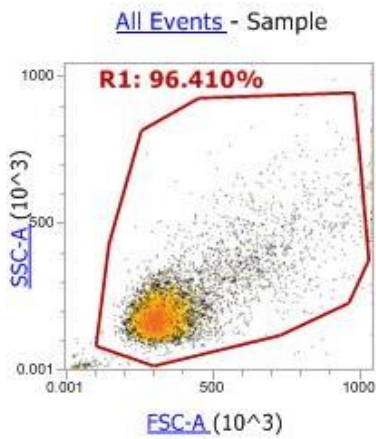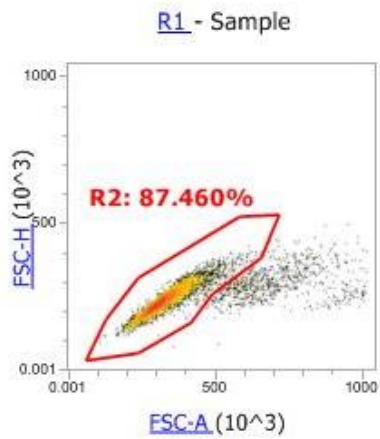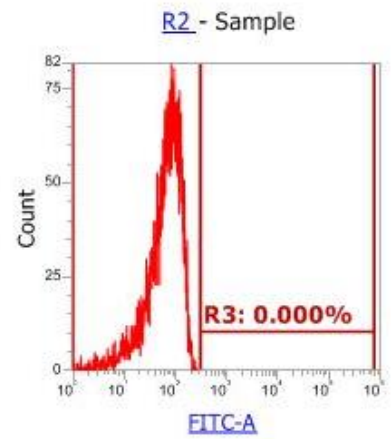

5hmC staining

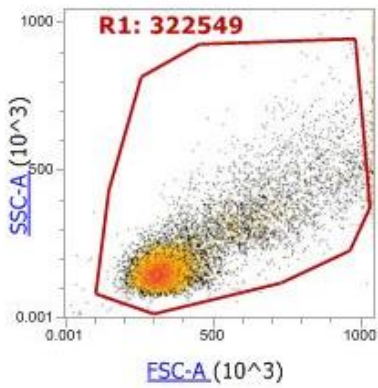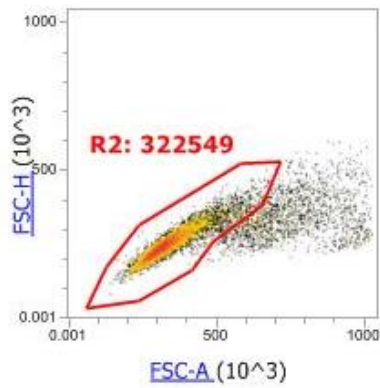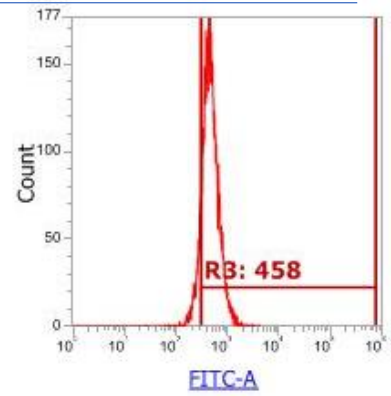

FITC: 5hmC  
fluorescence intensity
