# Supplementary material
Source: PubMed Central journal article supplement (PMC9305987)
Supplement: NIHMS1820811-supplement-Supplementary_Table.pdf [file NIHMS1820811-supplement-Supplementary_Table.pdf]

Supplementary Table S1 Primer information

| Name                   | Sequence                   | Application           | Species |
|------------------------|----------------------------|-----------------------|---------|
| <i>sgRelA-#1-Upper</i> | CACCGCTTACCTGAGGGAAAGATGA  | <i>sgRelA</i> cloning | MUS     |
| <i>sgRelA-#1-Lower</i> | AAACTCATCTTTCCCTCAGGTAAGC  | <i>sgRelA</i> cloning | MUS     |
| <i>sgRelA-#2-Upper</i> | CACCGGACCCTGACCATGGACGGTG  | <i>sgRelA</i> cloning | MUS     |
| <i>sgRelA-#2-Lower</i> | AAACCACCGTCCATGGTCAGGGTCC  | <i>sgRelA</i> cloning | MUS     |
| <i>sgRelA-#3-Upper</i> | CACCGCCC GGGACCCTGACCATGGA | <i>sgRelA</i> cloning | MUS     |
| <i>sgRelA-#3-Lower</i> | AAACTCCATGGTCAGGGTCCC GGGC | <i>sgRelA</i> cloning | MUS     |
| <i>sgTET2-#1-Upper</i> | CACCGAGAGGTTCTGTATGGCTGAT  | <i>sgTET2</i> cloning | MUS     |
| <i>sgTET2-#1-Lower</i> | AAACATCAGCCATACAGAACCTCTC  | <i>sgTET2</i> cloning | MUS     |
| <i>sgTET2-#2-Upper</i> | CACCGAAAGTGCCAACAGATATCCA  | <i>sgTET2</i> cloning | MUS     |
| <i>sgTET2-#2-Lower</i> | AAACTGGATATCTGTTGGCACTTTC  | <i>sgTET2</i> cloning | MUS     |
| <i>sgTET2-#3-Upper</i> | CACCGATCAGCCATACAGAACCTCT  | <i>sgTET2</i> cloning | MUS     |
| <i>sgTET2-#3-Lower</i> | AAACAGAGGTTCTGTATGGCTGATC  | <i>sgTET2</i> cloning | MUS     |
| $\beta$ -ACTIN-F       | TGAGAGGGAAATCGTGCCTG       | qRT-PCR               | MUS     |
| $\beta$ -ACTIN-R       | TTGCTGATCCACATCTGCTGG      | qRT-PCR               | MUS     |
| <i>Irg1-F</i>          | CCAAGAGATTCCACCCTCCC       | qRT-PCR               | MUS     |
| <i>Irg1-R</i>          | AAACGTGGCTTCCATCCCAT       | qRT-PCR               | MUS     |
| <i>Nfkbiz-F</i>        | GCCAGGTCCAGATTAGGTGG       | qRT-PCR               | MUS     |
| <i>Nfkbiz-R</i>        | GAGGCCTCCCTCACCTAGAG       | qRT-PCR               | MUS     |
| <i>Tet2-F</i>          | CCACGTGGCCAAAGTAAACAG      | qRT-PCR               | MUS     |
| <i>Tet2-R</i>          | TTGAATGAATCCAGCAGCACC      | qRT-PCR               | MUS     |
| <i>IL6-F</i>           | TCCATCCAGTTGCCTTCTTG       | qRT-PCR               | MUS     |
| <i>IL6-R</i>           | TTCCACGATTTCCAGAGAA        | qRT-PCR               | MUS     |
| <i>IL1B-F</i>          | TACGGACCCCAAAGATGA         | qRT-PCR               | MUS     |
| <i>IL1B-R</i>          | TGCTGCTGCGAGATTTGAAG       | qRT-PCR               | MUS     |
| <i>Cxcl9-F</i>         | GAGCAGTGTGGAGTTCGAGG       | qRT-PCR               | MUS     |
| <i>Cxcl9-R</i>         | TCCGGATCTAGGCAGGTTTG       | qRT-PCR               | MUS     |
| <i>Cxcl10-F</i>        | AATGAGGGCCATAGGGAAGC       | qRT-PCR               | MUS     |
| <i>Cxcl10-R</i>        | AGCCATCCACTGGGTAAAGG       | qRT-PCR               | MUS     |
| <i>Cxcl11-F</i>        | GCTTTCTCGATCTCTGCCAT       | qRT-PCR               | MUS     |
| <i>Cxcl11-R</i>        | AACAGGAAGGTCACAGCCAT       | qRT-PCR               | MUS     |
| <i>Il12a-F</i>         | GTCTGCCGGCTATCCAGAC        | qRT-PCR               | MUS     |
| <i>Il12a-R</i>         | GGCAAAAAGAGGAGGTAGCGT      | qRT-PCR               | MUS     |
| <i>IL15-F</i>          | ACAGCTCAGAGAGAATCCACC      | qRT-PCR               | MUS     |
| <i>IL15-R</i>          | GCTGCCATCCATCCAGAACT       | qRT-PCR               | MUS     |
| <i>Nfkbiz-F</i>        | CTCCAGTCCGGGTCTTG          | Chip-qPCR             | MUS     |
| <i>Nfkbiz-R</i>        | GCTCATCCTCGGGTTCCG         | Chip-qPCR             | MUS     |
